# Supplementary material for: The long non-coding RNA HOTTIP enhances pancreatic cancer cell proliferation, survival and migration
Source: PubMed Central journal article supplement (PMC4484423; doi:10.18632/oncotarget.3450), 2015-03-25
Supplement: oncotarget-06-10840-s001.pdf [file oncotarget-06-10840-s001.pdf]

## SUPPLEMENTARY TABLES

Supplementary Table S1: The siRNA complexes used in this study

| Name      | Sequence                  |
|-----------|---------------------------|
| siGL2     | CGU ACG CGG AAU ACU UCG A |
| siHOTTIP  | GCACAGAGAUAAUGGCAAAU      |
| siMLL     | SASI_Hs01_00090459        |
| siWDR5#1  | SASI_Hs01_00046875        |
| siWDR5#2  | SASI_Hs01_00046876        |
| siAURKA#1 | SASI_Hs01_00241476        |
| siAURKA#2 | SASI_Hs01_00241477        |

Supplementary Table S2: Primers used for Real Time-PCR

| Name    | Forward Primer          | Reverse Primer             |
|---------|-------------------------|----------------------------|
| TBP     | TGCACAGGAGCCAAGAGTGAA   | CACATCACAGCTCCCCACCA       |
| AHNAK   | CTGAAGTGGTTCTGAGCGG     | TCCACTCCATCTTCCGACTT       |
| HOXA13  | GGATATCAGCCACGACGAAT    | ATTATCTGGCAAAGCAACG        |
| HOXA11  | TGCCAAGTTGTACTTACTACGTC | GTTGGAGGAGTAGGAGTATGTCA    |
| HOXB7   | CGAGTTCCTTCAACATGCACT   | TTTGCGGTCTAGTTCCTGAGC      |
| HOXA9   | CTGTCCCACGCTTGACACTC    | CTCCGCCGCTCTCATTCTC        |
| HOXA10  | TGGCTCACGGCAAAGAGTG     | GCTGCGGCTAATCTCTAGGC       |
| SMAD3   | TGGACGCAGGTTCTCCAAAC    | CCGGCTCGCAGTAGGTAAC        |
| MMP3    | GAGCTAAGTAAAGCCAGTGGA   | GATATTTCTGAACAAGGTTTCATCGT |
| HOTTIP  | CCTAAAGCCACGCTTCTTTG    | TGCAGGCTGGAGATCCTAGT       |
| SGK1    | GCGCTAACGTCTTTTCTGTCT   | TGCTTCATGAAAGCGATGAG       |
| GDF15   | CTCCAGATTCCGAGAGTTGC    | CACTTCTGGTGAGTATCC         |
| MMP2    | CCCACTGCGGTTTTCTCGAAT   | CAAAGGGGTATCCATCGCCAT      |
| CD44    | TGCTACCAGAGACCAAGACA    | CCCATGTGAGTGTCCATCTG       |
| AURKA   | GTCAAGTCCCCTGTGCGTT     | AGTGAGACCTCTAGCTGT         |
| HOXA1   | TCCTGGAATACCCATACTTAGC  | GCACGACTGGAAAGTTGTAATCC    |
| IGF2BP3 | ATTTACAGTGGGAGGTGCTG    | GCAGTTTCCGAGTCAGTGTT       |
| TM4SF1  | TGGTTCTTTTCTGGCATCGT    | AGAAAGCATCGCACATCGTT       |
| PAK2    | GCCAAAGAATTATTACAGCATCC | TGCTTCTTTAGCTGCCATGA       |

**Supplementary Table S3: Common genes overexpressed in pancreatic tumors (GSE16515) and downregulated in Panc1 cells transfected with siHOTTIP**

| Gene    | EntrezGene ID | Gene Description                                                                             | GSE16515<br>Pancreatic tumor_vs_paired<br>adjacent normal pancreatic tissue<br>(Study: Pancreatic tumor compared<br>to normal pancreatic tissue) | HOTTIP regulated<br>gene list |
|---------|---------------|----------------------------------------------------------------------------------------------|--------------------------------------------------------------------------------------------------------------------------------------------------|-------------------------------|
| TM4SF1  | 4071          | transmembrane 4 L six family member 1                                                        | 4.19                                                                                                                                             | -5.21                         |
| SMS     | 6611          | spermine synthase                                                                            | 2.1                                                                                                                                              | -4.8                          |
| IGF2BP3 | 10643         | insulin-like growth factor 2 mRNA binding protein 3                                          | 8.48                                                                                                                                             | -4.38                         |
| NCEH1   | 57552         | neutral cholesterol ester hydrolase 1                                                        | 2.45                                                                                                                                             | -4.06                         |
| UBASH3B | 84959         | ubiquitin associated and SH3 domain containing B                                             | 2.37                                                                                                                                             | -4.02                         |
| PLAU    | 5328          | plasminogen activator, urokinase                                                             | 6.39                                                                                                                                             | -3.69                         |
| NT5E    | 4907          | 5'-nucleotidase, ecto (CD73)                                                                 | 2.94                                                                                                                                             | -3.65                         |
| PAK2    | 5062          | p21 protein (Cdc42/Rac)-activated kinase 2                                                   | 2.22                                                                                                                                             | -3.62                         |
| AURKA   | 6790          | aurora kinase A                                                                              | 2.52                                                                                                                                             | -3.56                         |
| LDLR    | 3949          | low density lipoprotein receptor                                                             | 2.38                                                                                                                                             | -3.43                         |
| F2RL1   | 2150          | coagulation factor II (thrombin) receptor-like 1                                             | 2.29                                                                                                                                             | -3.38                         |
| SLC44A1 | 23446         | solute carrier family 44, member 1                                                           | 2.32                                                                                                                                             | -3.34                         |
| ADORA2B | 136           | adenosine A2b receptor                                                                       | 3.45                                                                                                                                             | -3.2                          |
| PNMA2   | 10687         | paraneoplastic Ma antigen 2                                                                  | 2.02                                                                                                                                             | -2.88                         |
| ALDOC   | 230           | aldolase C, fructose-bisphosphate                                                            | 2.27                                                                                                                                             | -2.67                         |
| ERO1L   | 30001         | ERO1-like (S. cerevisiae)                                                                    | 3.87                                                                                                                                             | -2.52                         |
| ITGB1   | 3688          | integrin, beta 1 (fibronectin receptor, beta polypeptide, antigen CD29 includes MDF2, MSK12) | 2.11                                                                                                                                             | -2.49                         |

(Continued)

| Gene    | EntrezGene ID | Gene Description                                                                                                                   | GSE16515<br>Pancreatic tumor_vs_paired<br>adjacent normal pancreatic tissue<br>(Study: Pancreatic tumor compared<br>to normal pancreatic tissue) | HOTTIP regulated<br>gene list |
|---------|---------------|------------------------------------------------------------------------------------------------------------------------------------|--------------------------------------------------------------------------------------------------------------------------------------------------|-------------------------------|
| YWHAZ   | 7534          | tyrosine<br>3-monooxygenase/<br>tryptophan<br>5-monooxygenase<br>activation protein, zeta<br>polypeptide                           | 2.37                                                                                                                                             | -2.42                         |
| RAB31   | 11031         | RAB31, member RAS<br>oncogene family                                                                                               | 3.39                                                                                                                                             | -2.4                          |
| PALLD   | 23022         | palladin, cytoskeletal<br>associated protein                                                                                       | 3.09                                                                                                                                             | -2.39                         |
| ELF4    | 2000          | E74-like factor 4 (ets<br>domain transcription<br>factor)                                                                          | 2.63                                                                                                                                             | -2.38                         |
| KIF11   | 3832          | kinesin family member<br>11                                                                                                        | 3.12                                                                                                                                             | -2.36                         |
| DPY19L1 | 23333         | dpy-19-like 1 (C.<br>elegans)                                                                                                      | 2.69                                                                                                                                             | -2.35                         |
| SEMA4B  | 10509         | sema domain,<br>immunoglobulin<br>domain (Ig),<br>transmembrane<br>domain (TM) and short<br>cytoplasmic domain,<br>(semaphorin) 4B | 2.48                                                                                                                                             | -2.32                         |
| PHLDA1  | 22822         | pleckstrin homology-<br>like domain, family A,<br>member 1                                                                         | 2.45                                                                                                                                             | -2.32                         |
| CD97    | 976           | CD97 molecule                                                                                                                      | 2.32                                                                                                                                             | -2.31                         |
| SLC16A3 | 9123          | solute carrier family<br>16, member 3<br>(monocarboxylic acid<br>transporter 4)                                                    | 8.25                                                                                                                                             | -2.29                         |
| ECT2    | 1894          | epithelial cell<br>transforming sequence<br>2 oncogene                                                                             | 5.83                                                                                                                                             | -2.28                         |
| TMEM189 | 387521        | transmembrane protein<br>189                                                                                                       | 2.05                                                                                                                                             | -2.28                         |
| CALML4  | 91860         | calmodulin-like 4                                                                                                                  | 2.74                                                                                                                                             | -2.24                         |
| SDC1    | 6382          | syndecan 1                                                                                                                         | 6.28                                                                                                                                             | -2.18                         |
| ITGB5   | 3693          | integrin, beta 5                                                                                                                   | 2.34                                                                                                                                             | -2.12                         |
| CCNB1   | 891           | cyclin B1                                                                                                                          | 4.14                                                                                                                                             | -2.09                         |

(Continued)

| Gene     | EntrezGene ID | Gene Description                                                                        | GSE16515<br>Pancreatic tumor_vs_paired<br>adjacent normal pancreatic tissue<br>(Study: Pancreatic tumor compared<br>to normal pancreatic tissue) | HOTTIP regulated<br>gene list |
|----------|---------------|-----------------------------------------------------------------------------------------|--------------------------------------------------------------------------------------------------------------------------------------------------|-------------------------------|
| SLC6A10P | 386757        | solute carrier family 6 (neurotransmitter transporter, creatine), member 10, pseudogene | 2.64                                                                                                                                             | -2.09                         |
| NUAK1    | 9891          | NUAK family, SNF1-like kinase, 1                                                        | 2.74                                                                                                                                             | -2.04                         |
| CLIC1    | 1192          | chloride intracellular channel 1                                                        | 2.7                                                                                                                                              | -2.04                         |
| ENO2     | 2026          | enolase 2 (gamma, neuronal)                                                             | 3.91                                                                                                                                             | -2.01                         |
| MALL     | 7851          | mal, T-cell differentiation protein-like                                                | 6.77                                                                                                                                             | -2                            |
| KIF2C    | 11004         | kinesin family member 2C                                                                | 2.65                                                                                                                                             | -2                            |
